# Supplementary material for: Prognostic impact of circulating plasma cells in patients with multiple myeloma: implications for plasma cell leukemia definition
Source: PubMed Central journal article supplement — Haematologica. 2017 Jun;102(6):1099–104. doi: 10.3324/haematol.2016.158303 (PMC5451342; doi:10.3324/haematol.2016.158303), 2017-06
Supplement: 2016.158303.GRANELL_SUPPL.pdf [file 2016.158303.GRANELL_SUPPL.pdf]

## Prognostic impact of circulating plasma cells in patients with multiple myeloma: implications for plasma cell leukemia definition

Miquel Granell,<sup>1</sup> Xavier Calvo,<sup>2,6</sup> Antoni Garcia-Guiñón,<sup>3</sup> Lourdes Escoda,<sup>4</sup> Eugènia Abella,<sup>5</sup> Clara M<sup>a</sup> Martínez,<sup>1</sup> Montserrat Teixidó,<sup>3</sup> M<sup>a</sup> Teresa Gimenez,<sup>4</sup> Alicia Senín,<sup>5</sup> Patricia Sanz,<sup>1</sup> Desirée Campoy,<sup>3</sup> Ana Vicent,<sup>4</sup> Leonor Arenillas,<sup>6</sup> Laura Rosiñol,<sup>2</sup> Jorge Sierra,<sup>1</sup> Joan Bladé<sup>2</sup> and Carlos Fernández de Larrea,<sup>2</sup> on behalf of GEMMAC (Grup per l'estudi del mieloma i l'amiloïdosi de Catalunya)

<sup>1</sup>Department of Haematology, Hospital de la Santa Creu i Sant Pau, IIB-Sant Pau and Josep Carreras Leukemia Research Institutes, Universitat Autònoma de Barcelona; <sup>2</sup>Amyloidosis and Myeloma Unit, Department of Haematology, Hospital Clínic and IDIBAPS, Universitat de Barcelona; <sup>3</sup>Department of Haematology, Hospital Universitari Arnau de Vilanova, Universitat de Lleida; <sup>4</sup>Department of Haematology, Hospital Joan XXIII, Universitat Rovira i Virgili, Tarragona; <sup>5</sup>Department of Haematology, Hospital del Mar-IMIM, Universitat Autònoma de Barcelona, and <sup>6</sup>Laboratory of Cytology, Department of Pathology, GRETNHE, IMIM Hospital del Mar Research Institute, Barcelona, Spain

©2017 Ferrata Storti Foundation. This is an open-access paper. doi:10.3324/haematol.2016.158303

Received: October 18, 2016.

Accepted: February 17, 2017.

Pre-published: March 2, 2017.

Correspondence: cfeman1@clinic.ub.es

---

## Supplementary material

**Table Supplementary 1. Clinical characteristics of patients with less than 5% versus those with  $\geq 5\%$  circulating plasma cells in peripheral blood.**

| Circulating plasma cells                   | <5%              | $\geq 5\%$     |
|--------------------------------------------|------------------|----------------|
| N (% overall)                              | 465 (96.5)       | 17 (3.5)       |
| Male, n (%)                                | 251 (53.9)       | 9 (53)         |
| Age, y. median (range)                     | 70 (32-92)       | 64 (48-85)     |
| Heavy chain, n (%):                        |                  |                |
| - IgG                                      | 276 (59.4)       | 9 (53)         |
| - IgA                                      | 110 (23.7)       | 2 (12)         |
| - light chain only                         | 75 (16.1)        | 6 (35)         |
| - IgD or IgM                               | 4 (0.8)          | 0              |
| Light chain, n (%):                        |                  |                |
| - kappa                                    | 301 (64.7)       | 7 (41)         |
| - lambda                                   | 164 (35.3)       | 10 (59)        |
| Haemoglobin, g/L. Median (range)           | 103 (56–171)     | 95 (40-144)    |
| WBC $\times 10^9$ /L. Median (range)       | 6.2 (0.9–22.6)   | 6.9 (3.7-63)   |
| Platelets $\times 10^9$ /L. Median (range) | 214 (50–558)*    | 91 (24-242)*   |
| Calcium, mg/dL. Median (range)             | 9.4 (7.2–14.8)   | 9.9 (9.0-15.8) |
| Creatinine, mg/dL. Median (range)          | 1.1 (0.3–12.2)   | 1.4 (0.6-8.0)  |
| Lytic lesions. n (%):                      |                  |                |
| - None                                     | 211 (45.4)       | 10 (59)        |
| - One to 3                                 | 229 (49.2)       | 5 (29)         |
| - More than 3                              | 25 (5.4)         | 2 (12)         |
| D-S stage. n (%):                          |                  |                |
| - I                                        | 62 (13.3)        | 3 (17.6)       |
| - II                                       | 197 (42.4)       | 3 (17.6)       |
| - III                                      | 206 (44.3)       | 11 (64.7)      |
| - B (creat >2mg/dL)                        | 82 (17.6)        | 7(41)          |
| $\beta 2$ -m, mg/L. median (range)         | 4.7 (1.0–48.0)   | 5.7 (2.9-31)   |
| Albumin, g/L. median (range)               | 36.2 (15.0-48.9) | 32 (24-45)     |
| ISS stage. n (%):                          |                  |                |
| - I                                        | 98 (21.1)        | 1 (6)          |
| - II                                       | 160 (34.4)       | 5 (29)         |
| - III                                      | 173 (37.2)       | 10 (59)        |
| - NA                                       | 34 (7.3)         | 1 (6)          |
| LDH UNL, n (%)                             | 70 (15.1)*       | 6 (35)*        |
| Bone marrow PC, %. median (range)          | 39.5 (1-100)*    | 51 (18-95)*    |
| Extramedullary disease, n (%)              | 88 (18.9)        | 4 (23.5)       |

\* $p < 0.001$ . WBC: White blood cells. D-S: Durie-Salmon.  $\beta 2$ -m: beta-2 microglobulin. ISS: International Staging System. LDH: Lactate dehydrogenase. UNL: Upper normal limit. PC: plasma cells.
