# Supplementary material for: Prognostic impact of circulating plasma cells in patients with multiple myeloma: implications for plasma cell leukemia definition
Source: PubMed Central journal article supplement — Haematologica. 2017 Jun;102(6):1099–104. doi: 10.3324/haematol.2016.158303 (PMC5451342; doi:10.3324/haematol.2016.158303), 2017-06
Supplement: 2016_158303-Disclosures_and_Contributions.pdf [file 2016_158303-Disclosures_and_Contributions.pdf]

Haematologica  
HAEMATOL/2016/158303  
Version 4

Prognostic impact of circulating plasma cells in patients with multiple myeloma: implications for plasma cell leukaemia definition

Miquel Granell, Xavier Calvo, Antoni Garcia-Guiñón, Lourdes Escoda, Eugènia Abella, Clara M. Martínez, Montserrat Teixidó, Maria Teresa Gimenez, Alicia Senín, Patricia Sanz, Desirée Campoy, Ana Vicent, Leonor Arenillas, Laura Rosiñol, Jorge Sierra, Joan Blade, and Carlos Fernández de Larrea

Disclosures: ACKNOWLEDGMENTS This study was supported in part by grants AGAUR 2014SGR-1281 and 2014SGR-552 (Generalitat de Catalunya), and RD12/0036/0071, RD12/0036/0046 and PI16/00423 (Instituto de Salud Carlos III) and Fondo Europeo de Desarrollo Regional (FEDER) as well as a grant from Cellex Research Foundation, Barcelona, Spain. CONFLICT OF INTEREST The authors have no competing interests.

Contributions: MG, JS, JB and CF designed the study, analysed the data and wrote the paper. XC, CM, MT, TG and LA reviewed peripheral blood smears. AG, LE, EA, AS, PS, DC, AV and LR collected clinical data. All the authors reviewed and approved the final version of the manuscript.
